# Supplementary material for: Construction of a near-infrared responsive upconversion nanoplatform against hypoxic tumors via NO-enhanced photodynamic therapy
Source: Royal Society of Chemistry journal article supplement (doi:10.1039/c9nr10453d), 2020-01-01

Building a near-infrared responsive upconverting nanoplatform against hypoxic tumors *via* NO-enhanced photodynamic therapy

Ying Lan<sup>a</sup>, Xiaohui Zhu<sup>\*a</sup>, Ming Tang<sup>a</sup>, Yihan Wu<sup>a</sup>, Jing Zhang<sup>a</sup>, Jinliang Liu<sup>a</sup>, Yong Zhang<sup>\*a,b</sup>

1. School of Environmental and Chemical Engineering, Shanghai University, Shanghai, China, 200444

2. Department of Biomedical Engineering, Faculty of Engineering, National University of Singapore, Singapore 117583

Corresponding Author:

\*E-mail: xhzhu@shu.edu.cn; biezy@nus.edu.sg.

### Supporting Figure Captions

**Figure S1.** X-ray diffraction patterns of NaYF<sub>4</sub>:Yb core, NaYF<sub>4</sub>:Yb@NaYbF<sub>4</sub>:Tm/Gd core-shell and NaYF<sub>4</sub>:Yb@NaYbF<sub>4</sub>:Tm/Gd@NaYF<sub>4</sub> core-shell-shell nanoparticles.

The standard pattern of β-NaYF<sub>4</sub> (JCPDS 16-0334) is used as a reference.

**Figure S2.** TEM image and size distribution (inset) of the NaYF<sub>4</sub>@NaYbF<sub>4</sub>:Tm@NaYF<sub>4</sub> core-shell-shell nanoparticles with varying inner shell thickness. Scale bars for all images are 100 nm.

**Figure S3.** Comparison of upconversion emission intensity of the core-shell NaYF<sub>4</sub>:Yb/Tm@NaYF<sub>4</sub> with core-shell-shell NaYF<sub>4</sub>@NaYbF<sub>4</sub>:Tm@NaYF<sub>4</sub> nanoparticles.

**Figure S4.** Luminescence decay curves of a series of NaYF<sub>4</sub>:x%Yb@NaYbF<sub>4</sub>:1%Tm,30%Gd@NaYF<sub>4</sub> (x=0, 15, 30, 45) UCNPs under 980 nm excitation.

**Figure S5.** Zeta potential of UCNPs@mSiO<sub>2</sub> and UCNPs@mSiO<sub>2</sub>-NH<sub>2</sub> in ethanol solution.

**Figure S6.** UV-Vis absorption spectra of standard curcumin **(a)** and RBS **(b)** solution with different concentrations. The calibration curve (concentration vs. absorbance) of solution at 425 nm for **(c)** curcumin and 350 nm for **(d)** RBS.

**Figure S7.** UV-Vis absorption spectra of supernatants of UCNPs@mSiO<sub>2</sub>-CUR-RBS collected by centrifugation after they were soaked in deionized water, PBS buffer and cell culture medium (DMEM) for 24 hours.

**Figure S8.** Representative photographs of segregated tumors after 14 days of PDT treatment.

**Figure S9.** Standard curve of Griess assay for NO detection.

Figure S1

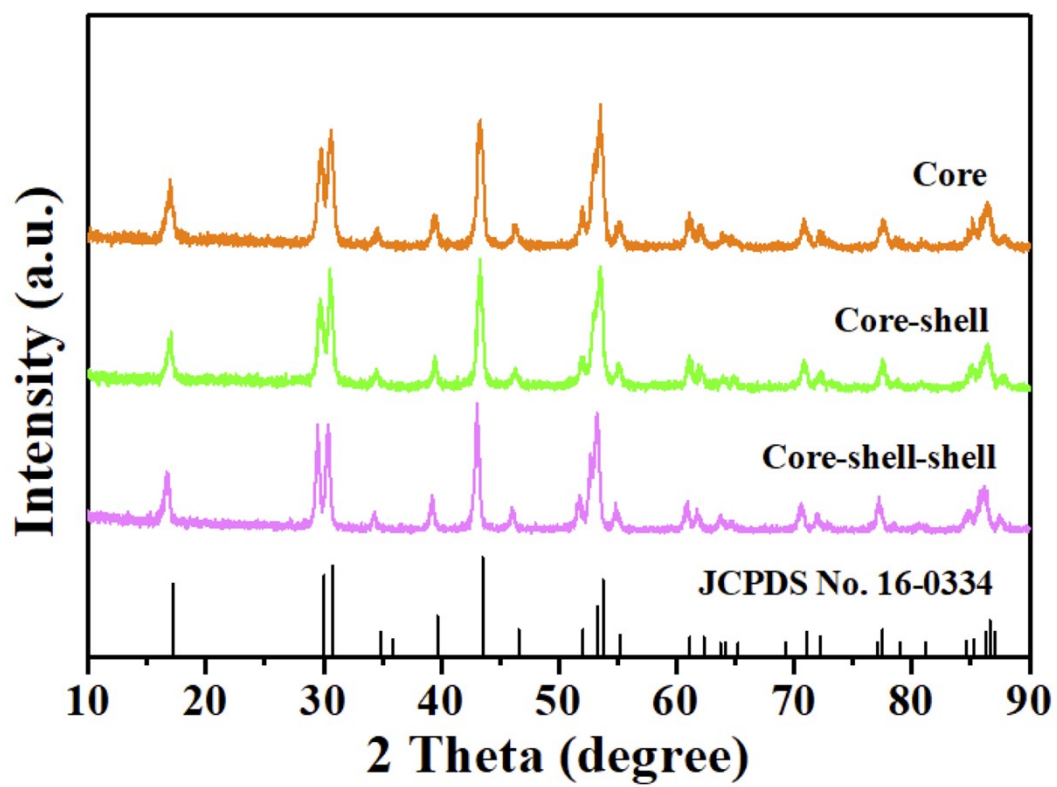

Figure S2

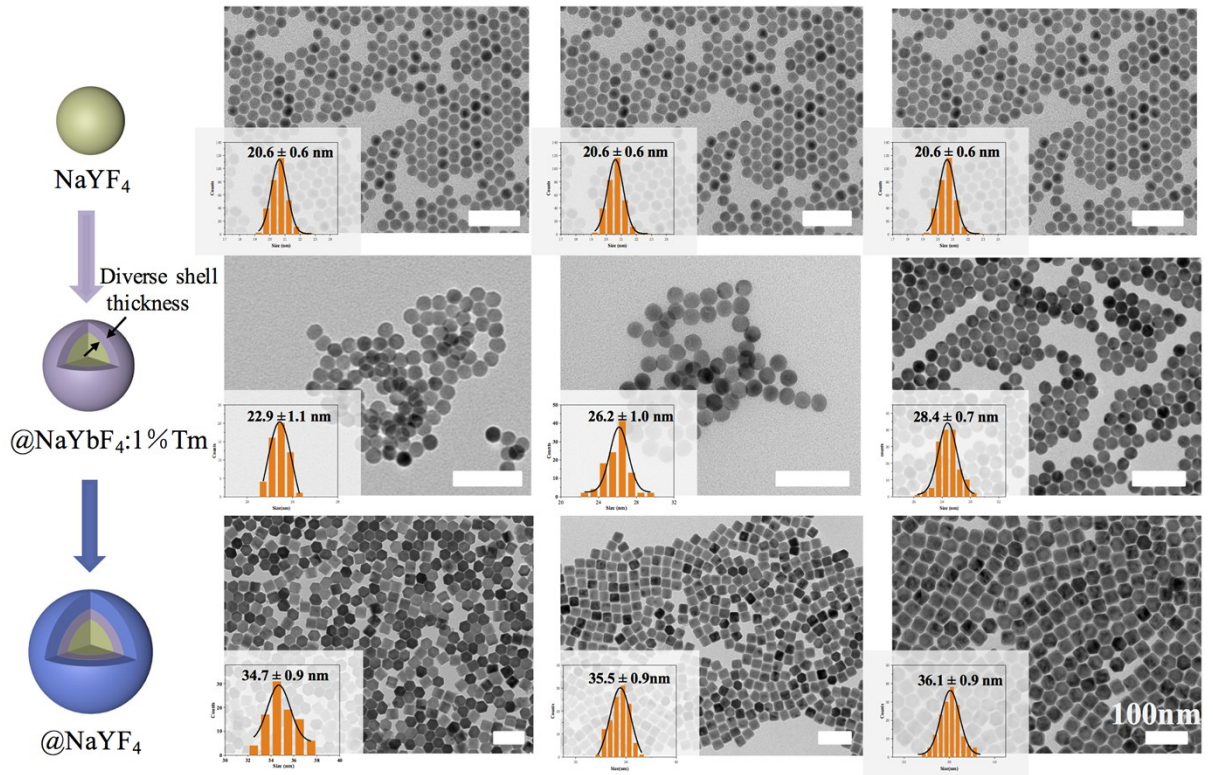

Figure S3

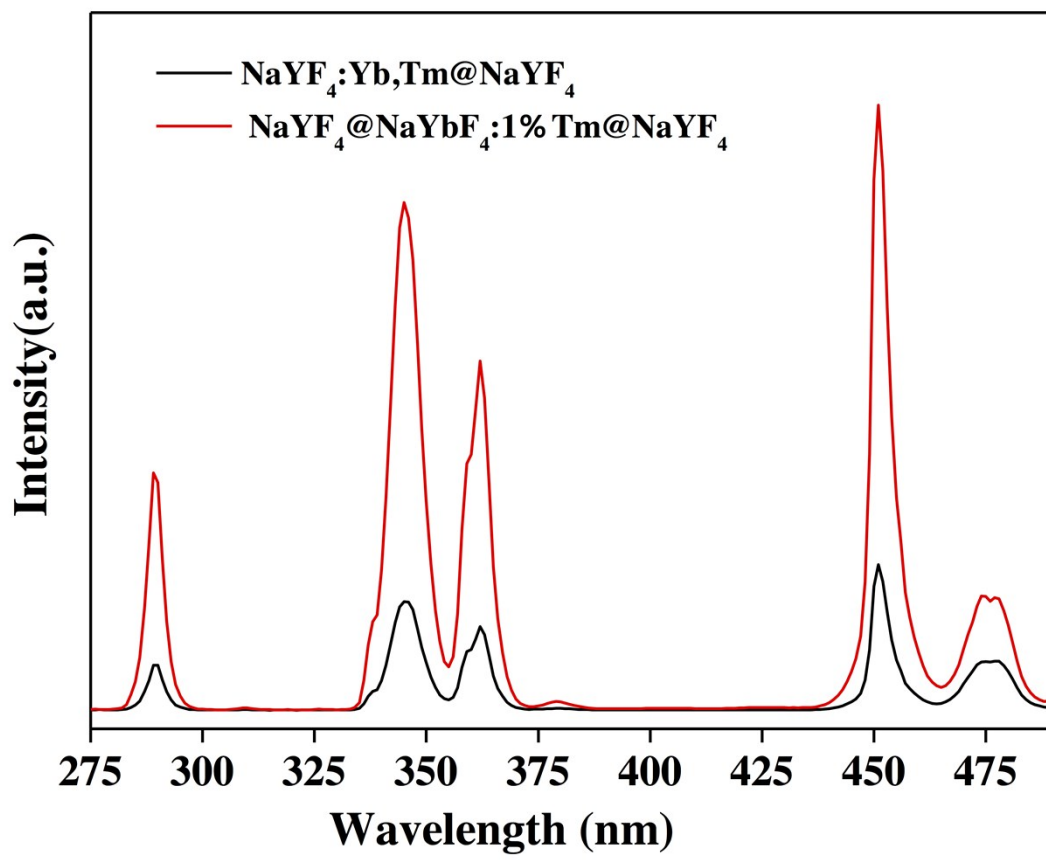

Figure S4

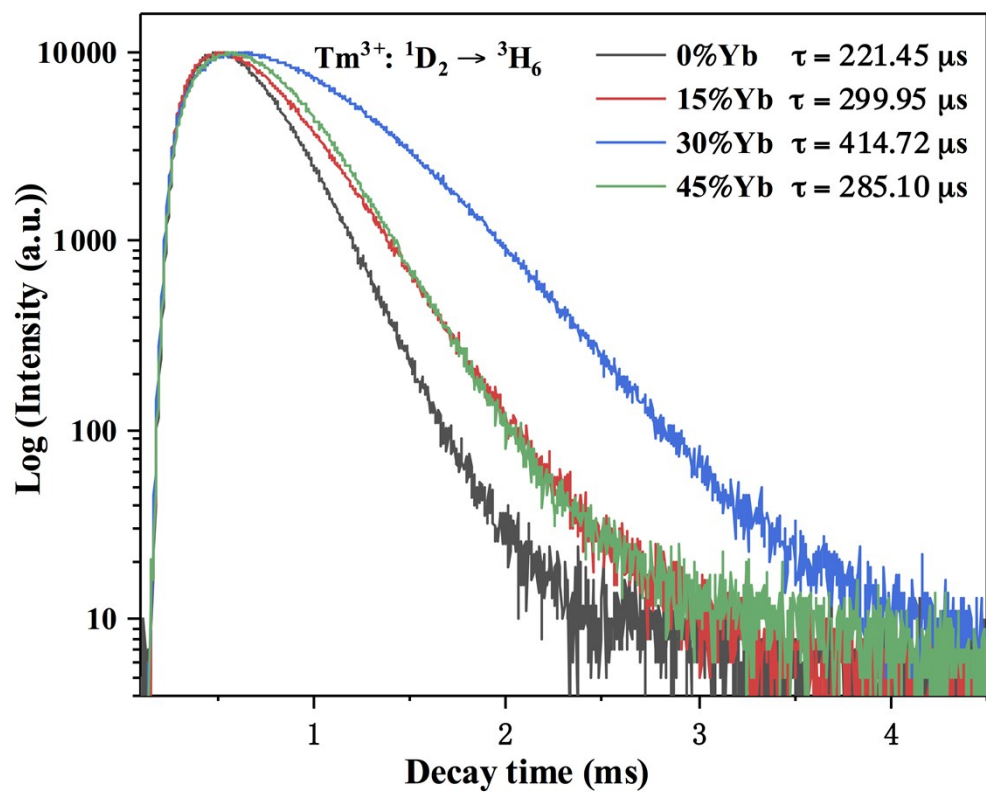

Figure S5

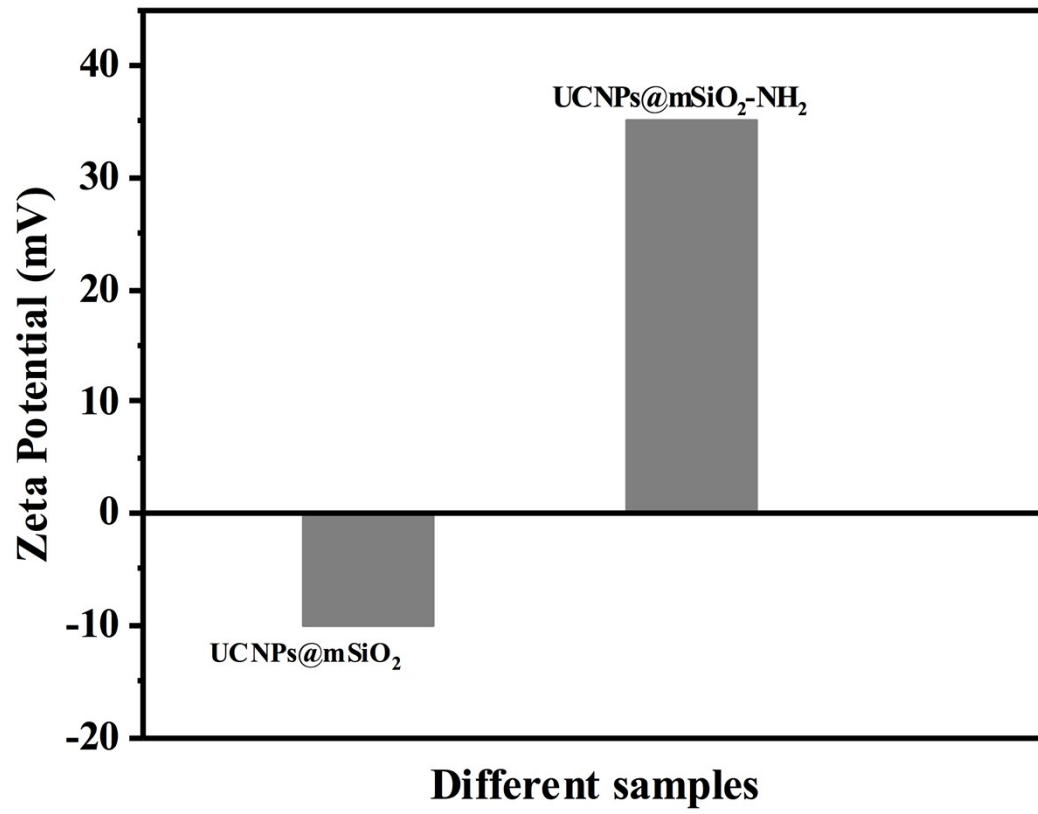

Figure S6

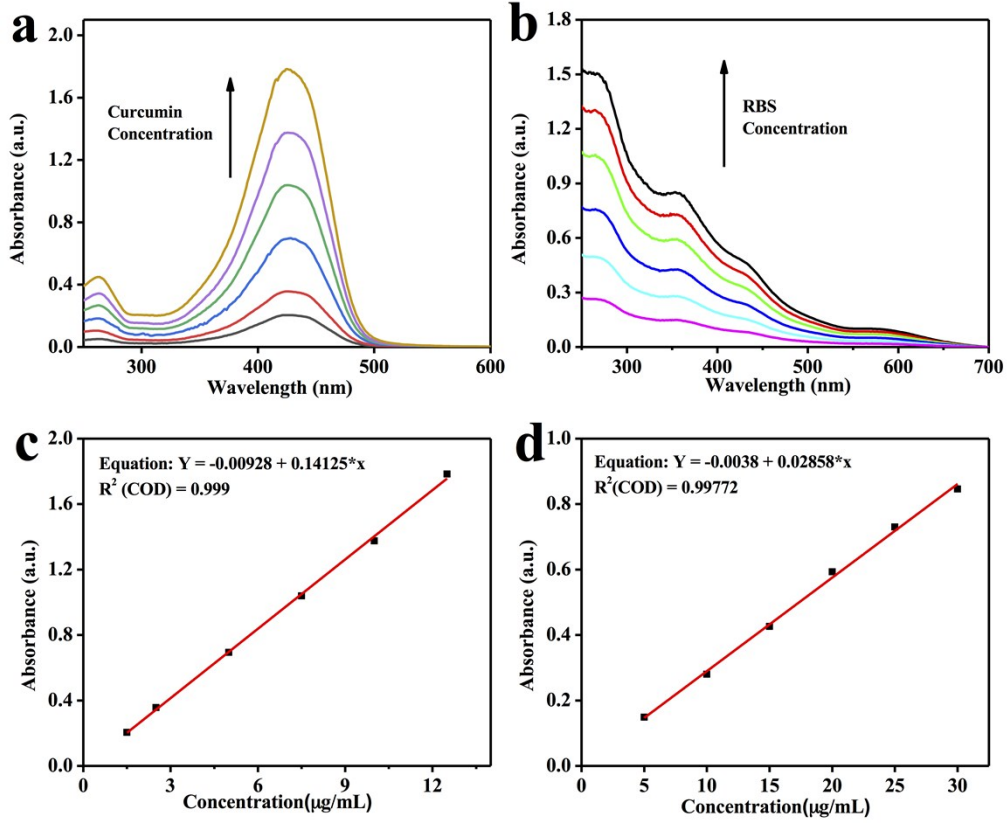



Figure S7

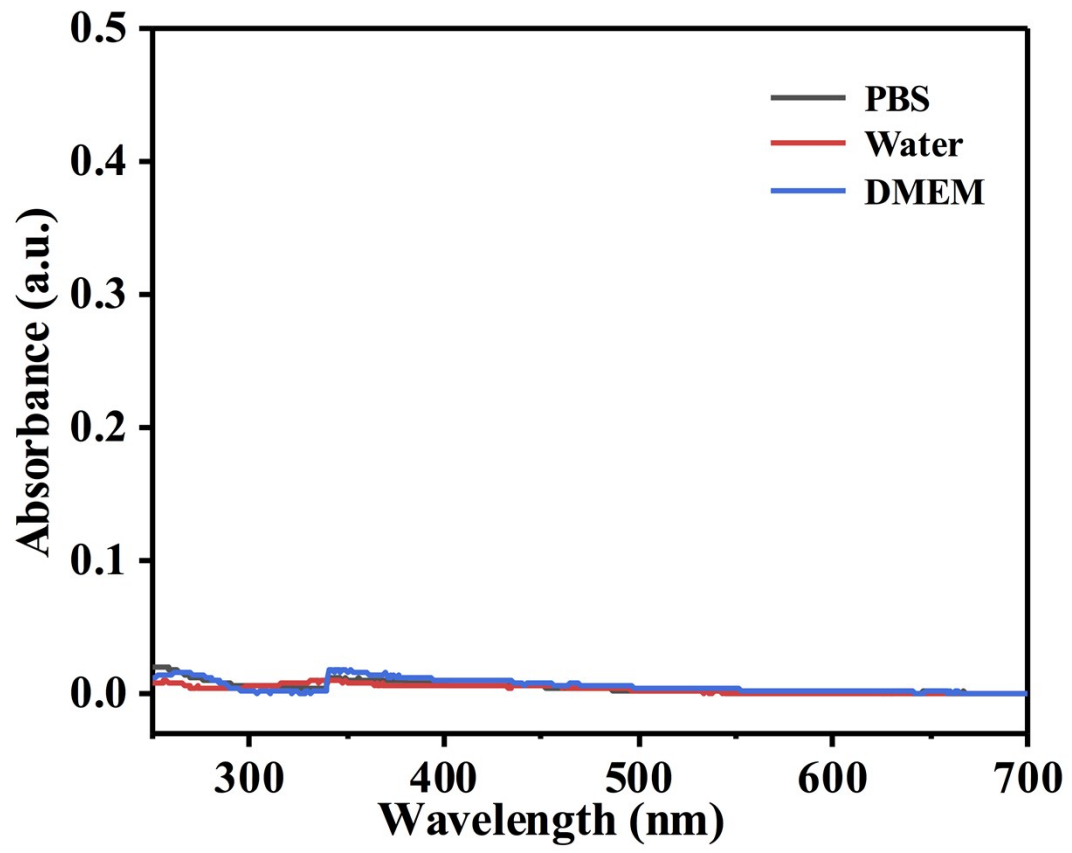

**Figure S8**

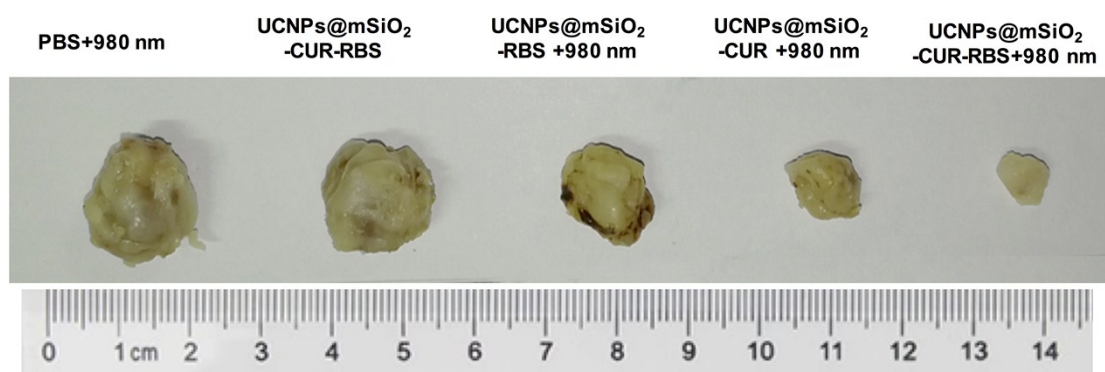

Figure S9

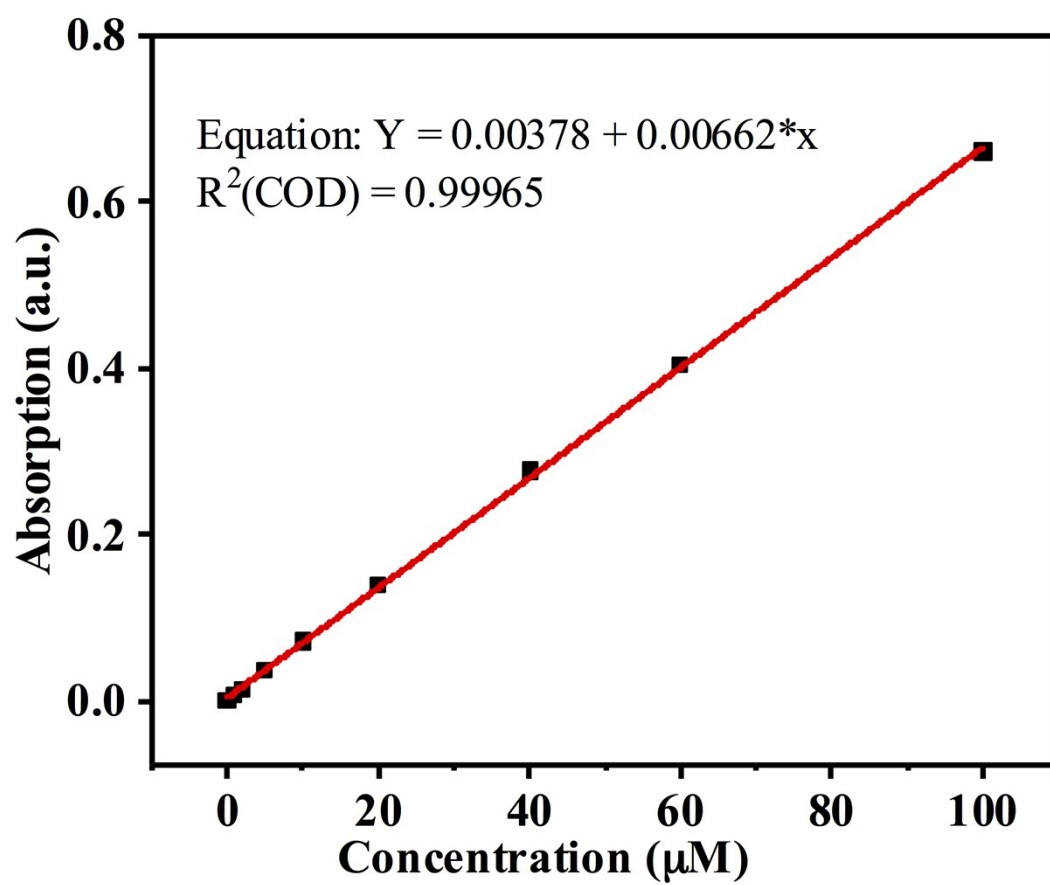

Supplement: c9nr10453d1.pdf [file c9nr10453d1.pdf]
